# Supplementary material for: Ultrastructure and Membrane Traffic During Cell Division in the Marine Pennate Diatom Phaeodactylum tricornutum
Source: PubMed Central journal article supplement — Protist. 2015 Nov;166(5):506–21. doi: 10.1016/j.protis.2015.07.005 (PMC4710849; doi:10.1016/j.protis.2015.07.005), 2015-11
Supplement: mmc5.pdf [file mmc5.pdf]

|          | Phylum                                                                    | Species                         | Sequence code | Protein information                                                                                                                        | GI No. (NCBI) |
|----------|---------------------------------------------------------------------------|---------------------------------|---------------|--------------------------------------------------------------------------------------------------------------------------------------------|---------------|
| Rab      |                                                                           |                                 | ScYpt1p       | Ras-like small GTPase, involved in the ER-to-Golgi step of the secretory pathway; complex formation                                        | 14318480      |
|          |                                                                           |                                 | ScSec4        | D Chain D, Crystal Structure Of Sec4-Gdp                                                                                                   | 12084566      |
|          |                                                                           |                                 | ScYpt32p      | probably involved in intra-Golgi transport or in the formation of transport vesicles at the most distal Golgi compartment; ras-like GTPase | 6321228       |
|          |                                                                           |                                 | ScYpt31p      | probably involved in intra-Golgi transport or in the formation of transport vesicles at the most dis                                       | 6320869       |
|          |                                                                           |                                 | ScYpt53p      | Involved in vacuolar protein sorting and endocytosis; GTP-binding protein of the rab family                                                | 6324236       |
|          |                                                                           |                                 | ScYpt51       | A Chain A, Gppnhp-Bound Ypt51 At 1.48 A Resolution                                                                                         | 7767071       |
|          |                                                                           |                                 | ScYpt52p      | rab5-like GTPase involved in vacuolar protein sorting and endocytosis; probable purine nucleotide-binding protein                          | 6322866       |
|          |                                                                           |                                 | ScYpt10p      | similar to Rab proteins and other small GTP-binding proteins                                                                               | 37362623      |
|          |                                                                           |                                 | ScYpt6p       | Ras-like GTP binding protein involved in the secretory pathway, required for fusion of endosome-deri                                       | 6323291       |
|          |                                                                           |                                 | ScYpt7p       | A Chain A, Gdp-Bound Ypt7p At 1.35 A Resolution                                                                                            | 21465931      |
| ScYpt11p | Protein that acts positively on mitochondrial distribution toward the bud | 6324025                         |               |                                                                                                                                            |               |
| Others   | Ascomycota                                                                | <i>Saccharomyces cerevisiae</i> | ScRAS1        | RAS1 protein                                                                                                                               | 172361        |
|          |                                                                           |                                 | ScRAS2        | RAS2 protein                                                                                                                               | 172363        |
|          |                                                                           |                                 | ScRsr1p       | Gtp-binding protein of the ras superfamily involved in bud site selection; GTP-binding protein                                             | 6321591       |
|          |                                                                           |                                 | ScRhb1p       | rheb homologue; GTP-binding protein, ras family                                                                                            | 10383790      |
|          |                                                                           |                                 | ScRho3        | RHO3 protein                                                                                                                               | 730509        |
|          |                                                                           |                                 | ScRho1        | RHO1 protein                                                                                                                               | 132536        |
|          |                                                                           |                                 | ScRho2        | RHO2 protein                                                                                                                               | 19880921      |
|          |                                                                           |                                 | ScRho4        | RHO4 protein                                                                                                                               | 464610        |
|          |                                                                           |                                 | ScCdc42p      | Small rho-like GTPase, essential for establishment and maintenance of cell polarity                                                        | 6323259       |
|          |                                                                           |                                 | ScRho5p       | Rho family of small GTPases; Rho family GTPase                                                                                             | 6324149       |
|          |                                                                           |                                 | ScGsp2p       | GTP binding protein (mammalian Ranp homolog) involved in the maintenance of nuclear organization                                           | 6324759       |
|          |                                                                           |                                 | ScArf2p       | ADP-ribosylation factor 2                                                                                                                  | 6320064       |
|          |                                                                           |                                 | ScArf1p       | Soluble GTPase with a role in regulation of membrane traffic                                                                               | 6319641       |
|          |                                                                           |                                 | ScArf1p       | implicated in signal transduction and intracellular protein transport to or within the Golgi                                               | 6320009       |
|          |                                                                           |                                 | ScArf3p       | GTP-binding ADP-ribosylation factor                                                                                                        | 6324668       |
|          |                                                                           |                                 | Scrl3p        | Protein similar to ADP-ribosylation factor, involved in the carboxypeptidase Y pathway                                                     | 6325206       |
|          |                                                                           |                                 | ScSar1p       | Secretion-Associated, Ras-related. Component of COPII coat of vesicles; required for ER to Golgi                                           | 6325038       |
|          |                                                                           |                                 | ScCin4p       | GTP-binding protein involved in beta-tubulin (Tub2p) folding; isolated as mutant with increased chromosome loss and sensitivity to benomyl | 6323787       |

|          | Phylum                | Species                         | Sequence code | Protein information                                                                                                  | GI No. (NCBI) |
|----------|-----------------------|---------------------------------|---------------|----------------------------------------------------------------------------------------------------------------------|---------------|
| Syntaxin | Angiosperms           | <i>Oryza sativa</i>             | OsSyp41       | Putative syntaxin of plants 41                                                                                       | 55296198      |
|          |                       | <i>Arabidopsis thaliana</i>     | AtKNOLLE      | Syntaxin-related protein KNOLLE (Syntaxin 111)                                                                       | 2501102       |
|          |                       |                                 | AtSYP32       | Putative syntaxin SYP32                                                                                              | 30793955      |
|          | Ascomycota            | <i>Saccharomyces cerevisiae</i> | ScSso1        | SSO1 protein                                                                                                         | 730836        |
|          |                       |                                 | ScSso2        | Plasma membrane t-SNARE involved in fusion of secretory vesicles at the plasma membrane; syntaxin homolog            | 6323837       |
|          |                       |                                 | ScUfe1        | t-SNARE that resides on the endoplasmic reticulum and mediates retrograde traffic from the Golgi complex             | 6324649       |
|          |                       |                                 | ScSed5        | cis-Golgi t-SNARE syntaxin required for vesicular transport between the ER and the Golgi complex                     | 6323054       |
|          |                       |                                 | ScTlg2        | Member of the syntaxin family of t-SNAREs; tSNARE that affects a Late Golgi compartment                              | 6324555       |
|          |                       |                                 | ScPep12       | Target membrane receptor (t-SNARE) for vesicular intermediates traveling between the Golgi apparatus and the vacuole | 6324610       |
|          |                       |                                 | ScVam3p       | Syntaxin-related protein required for vacuolar assembly                                                              | 6324680       |
|          | Chordata              | <i>Homo sapiens</i>             | Hs_Stx16      | STX16 protein                                                                                                        | 49256597      |
|          |                       |                                 | Hs_Syt5-like  | PREDICTED: similar to Syntaxin-5                                                                                     | 113422931     |
|          |                       |                                 | Hs_Syt1A      | AAK54507 syntaxin 1A                                                                                                 | 15079184      |
|          |                       |                                 | Hs_Syt2       | Syntaxin 2 isoform 2                                                                                                 | 37577162      |
|          |                       |                                 | Hs_Syt18      | Syntaxin 18                                                                                                          | 8394376       |
| Hs_Stx7  | STX7_HUMAN Syntaxin-7 | 20532414                        |               |                                                                                                                      |               |
| Hs_Syt12 | Syntaxin 12           | 28933465                        |               |                                                                                                                      |               |
